# Supplementary material for: Amino acid mediated functionalization and reduction of graphene oxide – synthesis and the formation mechanism of nitrogen-doped graphene
Source: Royal Society of Chemistry journal article supplement (doi:10.1039/c4nj00308j), 2014-01-01
Supplement: c4nj00308j1.pdf [file c4nj00308j1.pdf]

## Electronic Supplementary Information

### Amino acid mediated functionalization and reduction of graphene oxide - synthesis and the formation mechanism of nitrogen-doped graphene

Anil Kumar\* and Mahima Khandelwal

Department of Chemistry, Indian Institute of Technology Roorkee, Roorkee - 247667, India  
Fax: +91 1332 273560; Tel: +91 1332 285799; E-mail: anilkfcy@iitr.ac.in

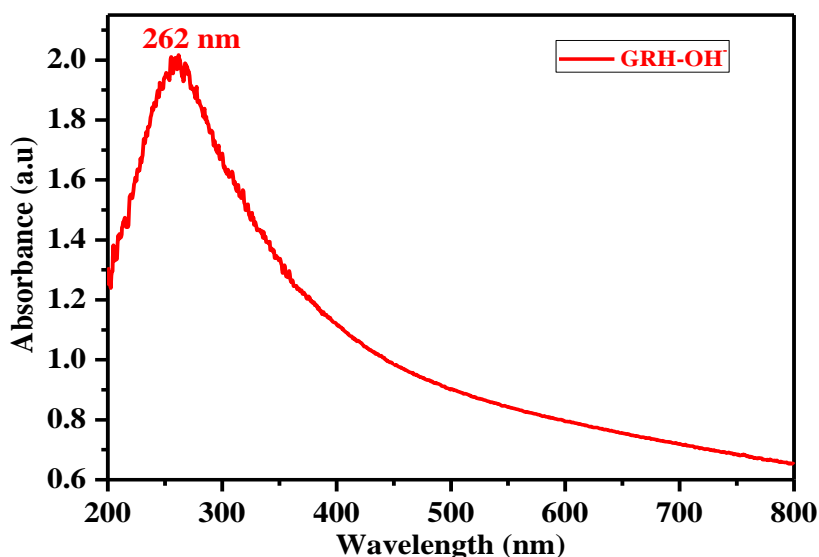

**Fig. S1** Optical absorption spectrum of GRH-OH after 13 h of reaction.

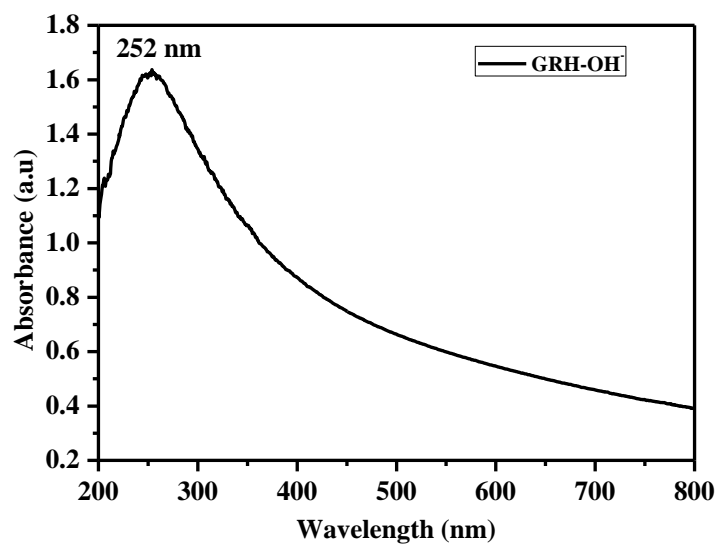

**Fig. S2** Optical absorption spectrum of GRH-OH<sup>-</sup> after 3 h of reaction.

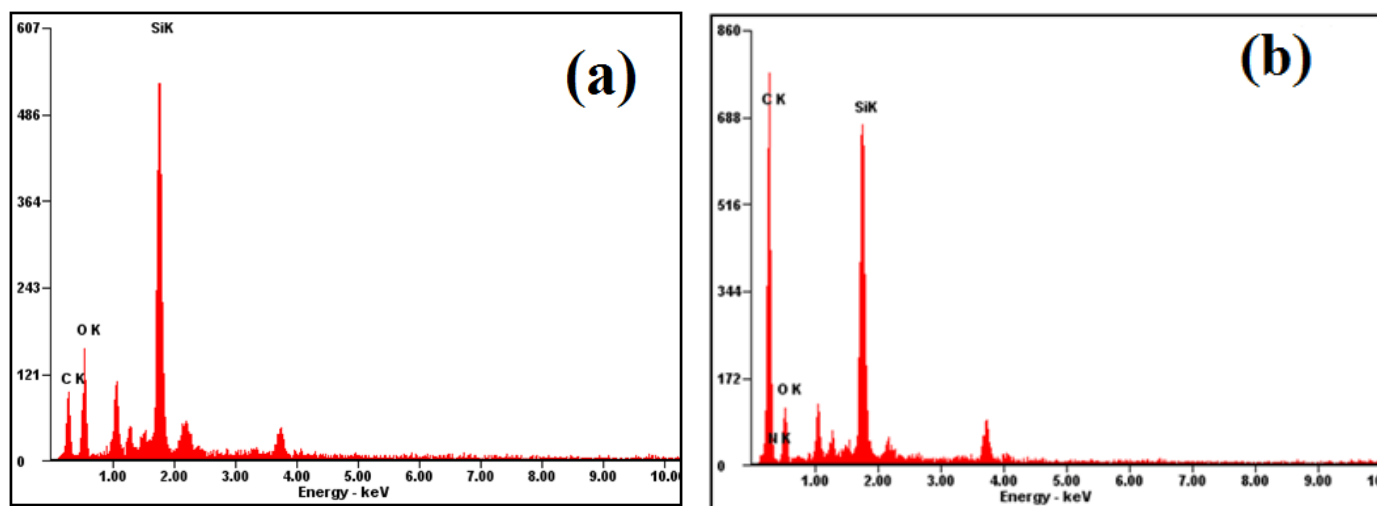

**Fig. S3** EDAX spectra of: GO (a) and GRH-AIB (b).

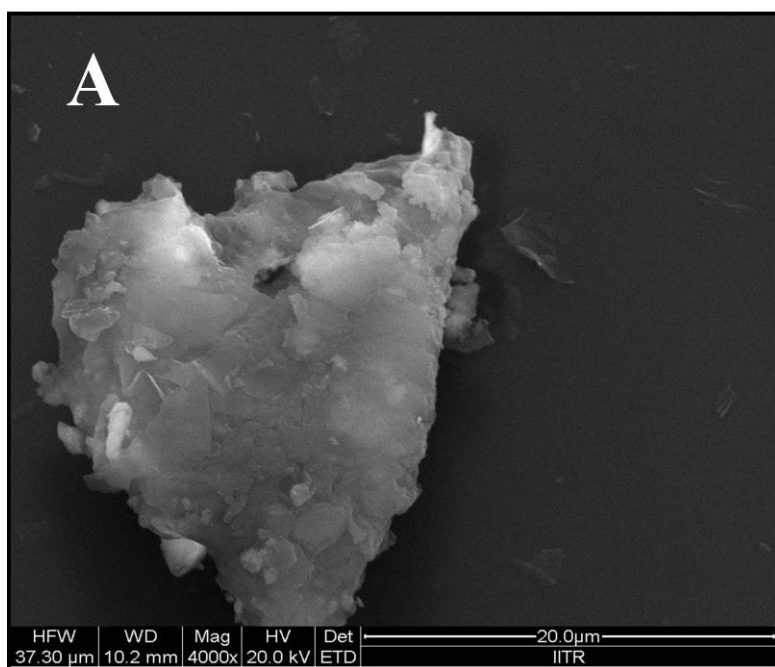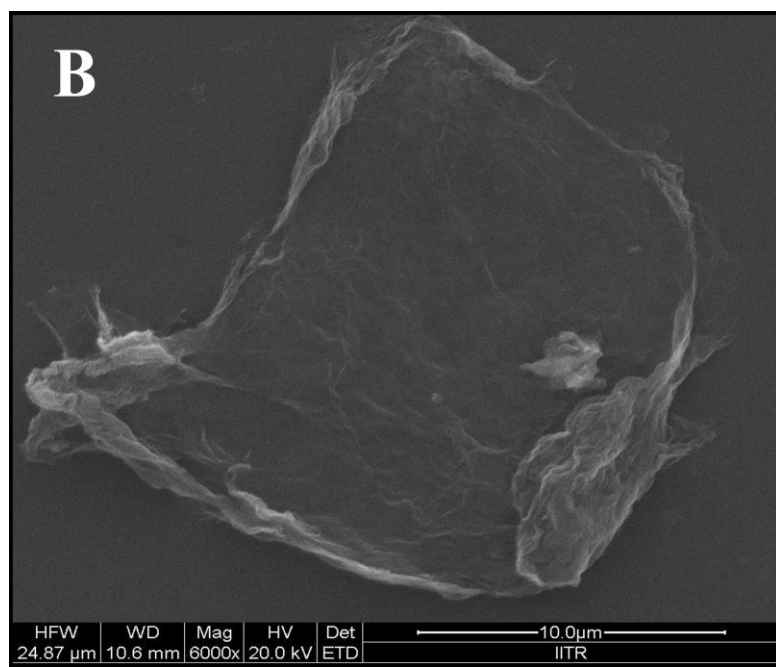

Fig. S4 FE-SEM images of GO (A) and GRH-AIB (B) recorded at lower magnifications.

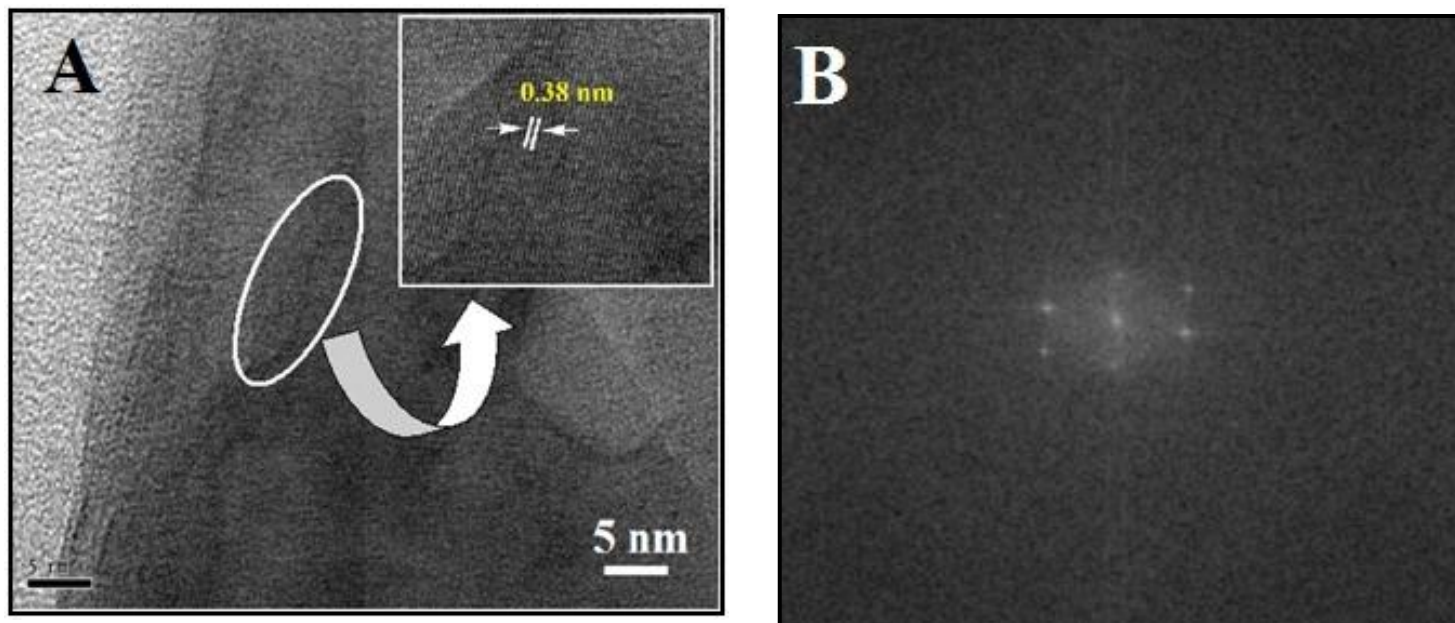

**Fig. S5** (A) HRTEM image of GRH-AIB showing interplanar distance 0.38 nm. (B) 2D FFT image showing hexagonal pattern recorded from TEM micrograph given in (Fig. S5A)

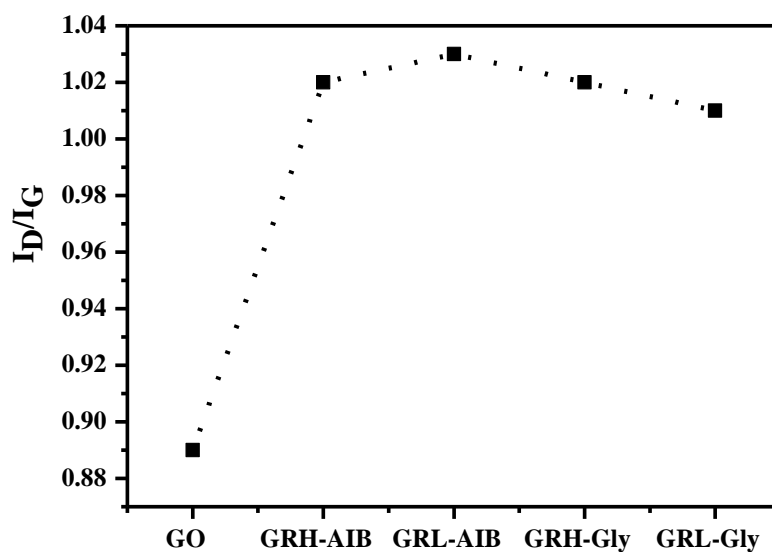

**Fig. S6**  $I_D/I_G$  ratio of: GO, GRH-AIB, GRL-AIB, GRH-Gly and GRL-Gly.

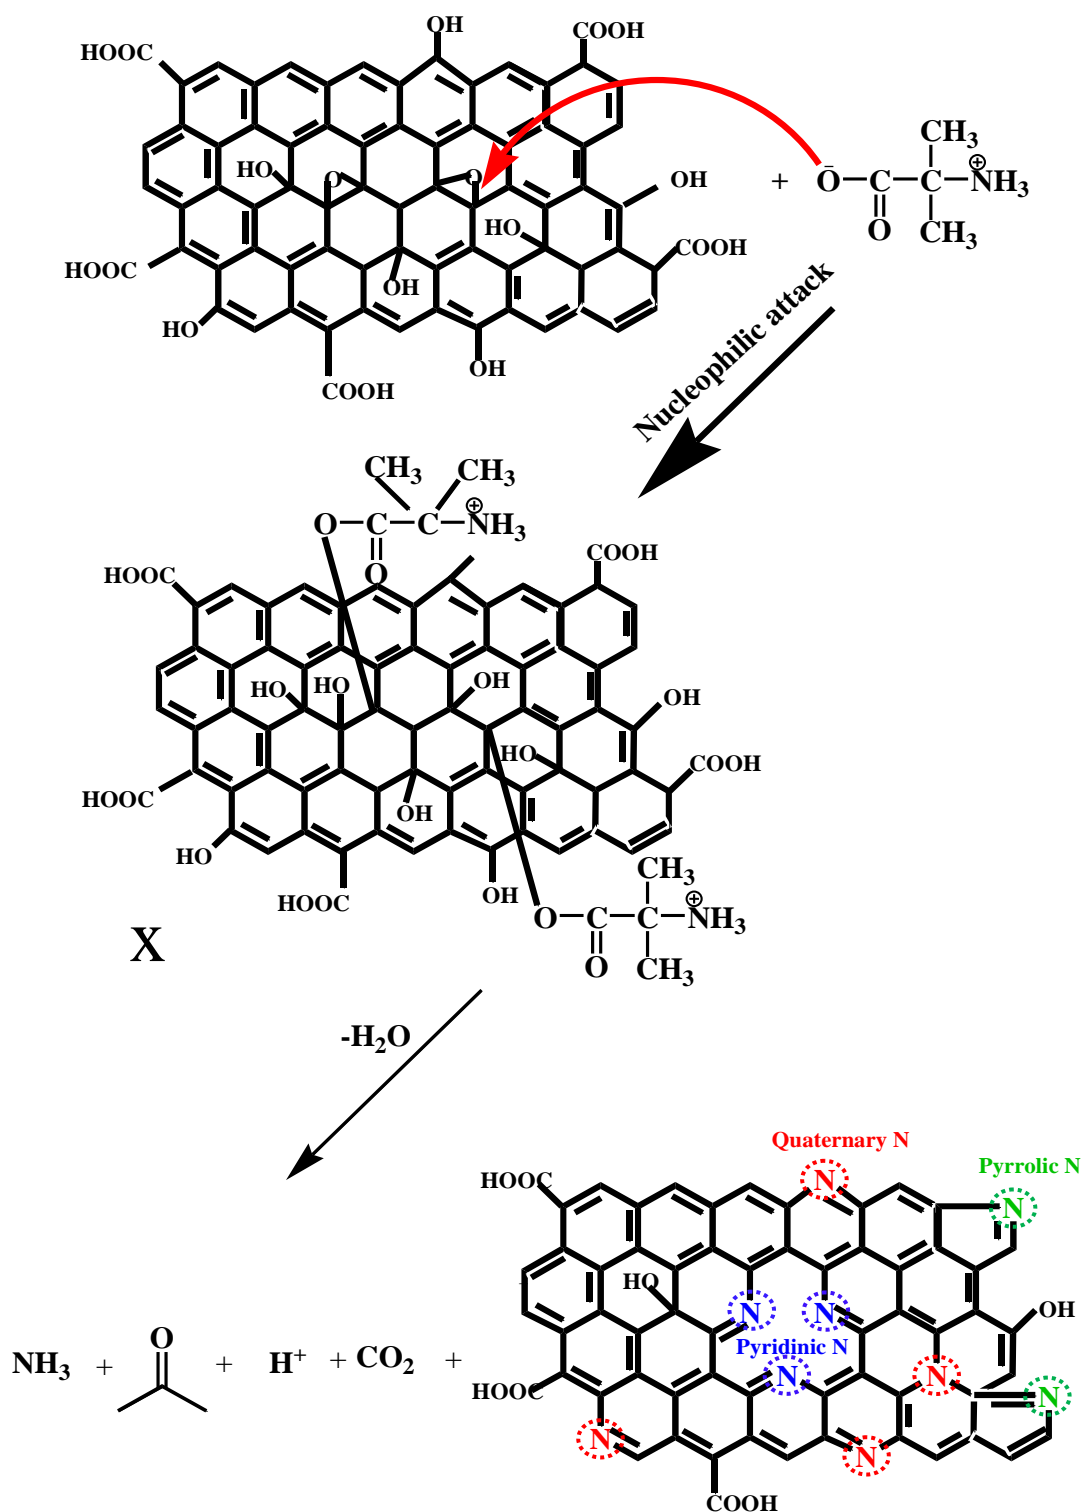

**Scheme S1** Mechanism depicting the nucleophilic attack of carboxylic group of AIB on the epoxy group of GO.

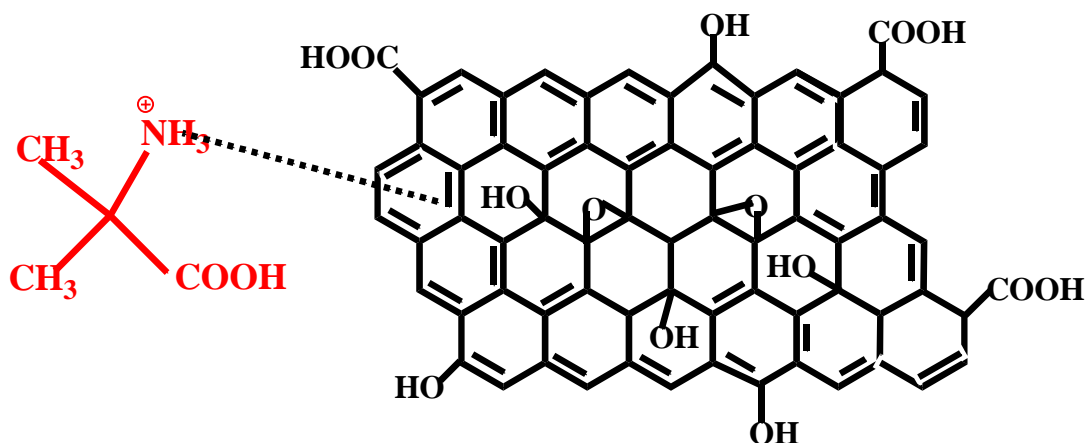

**Scheme S2** Cationic-Pi interaction of protonated amino group of AIB with GO.

**Table S1** Raman spectral data of graphite, GO, GRH-AIB, GRL-AIB, GRH-Gly and GRL-Gly.

| Sample   | D (cm <sup>-1</sup> ) | G (cm <sup>-1</sup> ) | 2D (cm <sup>-1</sup> )                           | D+G (cm <sup>-1</sup> ) | 2D' (cm <sup>-1</sup> ) | I <sub>D</sub> /I <sub>G</sub> |
|----------|-----------------------|-----------------------|--------------------------------------------------|-------------------------|-------------------------|--------------------------------|
| Graphite | 1357                  | 1575                  | 2687 (2D <sub>1</sub> ); 2727 (2D <sub>2</sub> ) | -                       | -                       | -                              |
| GO       | 1357                  | 1601                  | 2699                                             | 2934                    | -                       | 0.89                           |
| GRH-AIB  | 1351                  | 1598 (1623 D')        | 2709                                             | 2932                    | 3194                    | 1.02                           |
| GRL-AIB  | 1351                  | 1595 (1617 D')        | 2711                                             | 2936                    | 3198                    | 1.03                           |
| GRH-Gly  | 1351                  | 1597 (1617 D')        | 2710                                             | 2931                    | 3197                    | 1.02                           |
| GRL-Gly  | 1355                  | 1599 (1620 D')        | 2719                                             | 2944                    | 3198                    | 1.01                           |

**Table S2** Elemental analysis of FESEM images recorded in: GO (Fig. 6a) and GRH-AIB (Fig. 6b) as determined by EDAX.

| Sample  | Carbon (at%) | Oxygen (at%) | Nitrogen (at%) | C/O ratio | C/N ratio |
|---------|--------------|--------------|----------------|-----------|-----------|
| GO      | 56.65        | 28.20        | -              | 2.00      | -         |
| GRH-AIB | 81.09        | 9.64         | 3.2            | 8.4       | 25.1      |

Note - Remaining at% constitute silicon of glass substrate.
